# Supplementary material for: Sequence and organization of coelacanth neurohypophysial hormone genes: Evolutionary history of the vertebrate neurohypophysial hormone gene locus
Source: PubMed Central journal article supplement (PMC2315648; doi:10.1186/1471-2148-8-93), 2008-03-26
Supplement: 1471-2148-8-93-S1.pdf [file 1471-2148-8-93-S1.pdf]

AmnSINE1 (Human) -----GYCTRCAGC-CAYASACACCTCGGGCTR---TGATCTCGTCAGATCTCACAAGCT  
AmnSINE1 (Chicken) -----AGCCTGYAGC-CATACCACCTCGGGCTG---TGATCTCGTCAGATCTCACAAGCT  
AmnSINE1a (Coe) ---CTGCTGCATCAC-CAGGCCAGCTTTGGCAAAAATGTTTTAGTTGTGTAGAATGAAAG  
AmnSINE1b (Coe) GAGGGGCAGTAATACTCAGAATACCCTTGTTA---GGTTAAGTTCTTCCTGAGCCAAAA  
\* \* \* \* \*  
AmnSINE1 (Human) AAGCAGGGTTCGG-GCCTGGTCAATDCTTG--GATG--GAAGMCCTCCAAGGAAAAC---C  
AmnSINE1 (Chicken) AAGCAGGGTTCGG-GCCTGGTCAATDCTTG--GATG--GAAGMCCTCCAAGGAAAAC---C  
AmnSINE1a (Coe) AGATGCCATTAATATCTAAGCATTACTGTATGATGTTATAGTCTATTGATGATTATG--T  
AmnSINE1b (Coe) GGCTCTTGCTTA--TCTG-CTGTTTCTAT--GGTG--CAAGTGGACGAACTATGTTCT  
\* \* \* \* \*  
AmnSINE1 (Human) CAGGTGCTRCAGGAAGTGGTGYT-GGTGATTCAGTAGGTGGCACTCTTCCCTCTGA-GTC  
AmnSINE1 (Chicken) CAGGTGCTGYAGRAAGYGGTGYT-GGTGATTCAGTAGGTGGCACTCTTCCCTCTGA-GTC  
AmnSINE1a (Coe) CTCCTGTTTCCAACACCGAGGTTAGGTAGGGCCAACAACATCAGTTTCTTGACTGAAAGTA  
AmnSINE1b (Coe) TCCCTGGATACGACACCAGTGTATTACAGG-----TTAAGTCCCGCAGC-----  
\* \* \* \* \*  
AmnSINE1 (Human) AGTACTGAACCAATGYCCAGCATGGTGTAGGGGGCACTGTGYTGCGYGGAGGTGCCGTC  
AmnSINE1 (Chicken) AGTACTGAACCAATGCCCCAGCATGGTGTARRGGGCACTGTGTTGYTGGAGGTGCCGTC  
AmnSINE1a (Coe) AGTACCTAGACTGCCAGTCA-CCTCAAGTTTAGGGGCCCTACAGCACCCTCTGTGCTGTT  
AmnSINE1b (Coe) AACAGTCAGGTACTCATTACAGTTGAGTTGACTGA-GGTGCAC-TCGCTCTCCCTGGC  
\* \* \* \* \*  
AmnSINE1 (Human) --TTTCGGATGAGACGTAAAACCGAGGTCCTGACCACTTGCGGTCATTAAGATCCCATG  
AmnSINE1 (Chicken) --TTTCGGATGAGACGTAAAACCGAGGTCCTGACCACTTGCGGTCATTAAGATCCCATG  
AmnSINE1a (Coe) GGTCTCCCATGAAA-GTACTAGCAGG-CCTGACCCCTGTTAGCTTCTGAA-ATCAGACA  
AmnSINE1b (Coe) AGTCCCCCATCAA-GTACCAACCAGG-CCTGGCCCTGCTTAGCTTCTGAG-AACAAACA  
\* \* \* \* \*  
AmnSINE1 (Human) GCACTTTTCGTAAGAGTAGGGGTGTTAACCCCGGTGCTCTGGCCAAATCCAATTCGGGT  
AmnSINE1 (Chicken) GCACTTTTCGTAAGAGTARGGGTGTAAACYCGGTGCTCTGGCCAAATCCARYTCGGGT  
AmnSINE1a (Coe) GGATCAGGTGCACCCAGGGTGGGTTATAGTCCATTACTATCATTTAATGACCATTACCAT  
AmnSINE1b (Coe) GGATCGGGAACATCCA-AGCCAGTAAGGCACCTCCCTTGTTAGGTACTGGAAGATAATTT  
\* \* \* \* \*  
AmnSINE1 (Human) AATTACATTCGCTACCTAAATTCCTCCTGCAGT-TTCAATTGGATACGGTATTC-TTC  
AmnSINE1 (Chicken) AATTACATTCGCTACCTAAATTCCTCCTGCAGT-TTCAATTGGATACGGTATTC-TTC  
AmnSINE1a (Coe) AG--ACATTTGACTTCC---ATCTGGTGCATAAFACTGAGTTTGAGACAATTGCCACTC  
AmnSINE1b (Coe) -GCCACACTGTATATTA---TGTTTTGTTGAAAAAAAAAAAAAAAAAAAAAAAAAA---  
\* \* \* \* \*  
AmnSINE1 (Human) ACTTCTGTCTCAA-ACTGTTGTGTAGTGTGCTGTGCGCTGTTAAACAGCTGCCGCGTT  
AmnSINE1 (Chicken) AYTCTCTGTCTCAA-ACTGTTGTGTAGTGTGCTGTGCGCTGTTAAACAGCTGCCGCGTT  
AmnSINE1a (Coe) AATCTCAGTAGCACTGATGTCGC-CAGTATT-CTGCACATAAGTAAA-GGCAGGAGCAAG  
AmnSINE1b (Coe) AGATGTGGCAGCCT--TTTTTTTTCATTTATTTGTCATGCTTGTATGTGCTTGTATGTTA  
\* \* \* \* \*  
AmnSINE1 (Human) YCACCCAGAGGTGGCTGCATTTTCAGTGGTGGGTGAARTGATCYCTATATGTAGCTTGTGA  
AmnSINE1 (Chicken) TCACCCAGAGRTGGCTGCATTTTCAGTGGTGGRTGAAATGATCYBTATATGTAGYTTGTGA  
AmnSINE1a (Coe) GAGCAGTGGCTTCAGATGCAAAACAGGTGCCAGTCCCTTTTCTTTTTTAATTGGTTTTTC  
AmnSINE1b (Coe) ACTTATATATTTAGTTG-AGTTTTATTGTGTATCTTTGTAACCTAAAATACAAATCAA  
\* \* \* \* \*  
AmnSINE1 (Human) AAGCGCTTTG-----GGATCCTTCGGGATGAAAGGCGCTATATAAAC-GTAAGGTATT  
AmnSINE1 (Chicken) AAGCGCTTTG-----RGATCCTTCGGGATGAAAGGCGCTATATAAAC-GTAARGTATY  
AmnSINE1a (Coe) CAGTGTCTCCACTTACCAGGATTGGTTCTTCCAGCTCCGCTCAACTCTCTGTCTGGCACT  
AmnSINE1b (Coe) CAGTGAATTAAC---AAAATAAACAAAATGCAGAGAAAGGAAAGTTTC-TTACTGCAGT  
\* \* \* \* \*  
AmnSINE1 (Human) ATTATTATT-----  
AmnSINE1 (Chicken) ATTATA-----  
AmnSINE1a (Coe) GTGGAACCTTGACTGGAGCT  
AmnSINE1b (Coe) GAACAAGCTAGATAAACAA--
