# Supplementary material for: Sequence and organization of coelacanth neurohypophysial hormone genes: Evolutionary history of the vertebrate neurohypophysial hormone gene locus
Source: PubMed Central journal article supplement (PMC2315648; doi:10.1186/1471-2148-8-93), 2008-03-26
Supplement: 1471-2148-8-93-S2.pdf [file 1471-2148-8-93-S2.pdf]

UBOX5

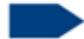

VT

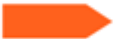

MT

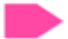

GNRH2

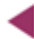

Scaff\_205

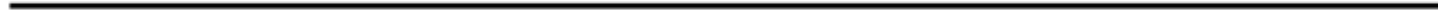

0

20

40

60

80 kb
